# Supplementary material for: Nirmatrelvir plus ritonavir remains effective in vaccinated patients at risk of progression with COVID-19: A systematic review and meta-analysis
Source: PubMed Central journal article supplement (PMC10357131; doi:10.7189/jogh.13.06032), 2023-07-21
Supplement: jogh-13-06032-s001.pdf [file jogh-13-06032-s001.pdf]

## **ONLINE SUPPLEMENTARY DOCUMENT**

**Title:** Nirmatrelvir plus ritonavir remains effective in vaccinated patients at risk of progression with COVID-19: a systematic review and meta-analysis

**Authors:** Huamin Li, Huairong Xiang, Bei He, Qizhi Zhang, Wenxing Peng

Table S1: The search details

Table S2: The data on outcomes

Table S3: Quality assignments based on the Newcastle-Ottawa Scale

Figure S1: The forest plot of sensitive analysis for all-cause death or hospitalization within 30 days

Figure S2: The funnel plot of all-cause death or hospitalization within 30 days

Table S1: The search details

Table S1a: The search details of PubMed

|    |                                                                                                                                                                                                                                                                                                                                                                                                                                                                                                                                                                                                                                                                                                                                                                                                                                                                                                                                                                                                                                                                                                                                                                                                                                                                                                                                                                                                                                                                                                                                                                                                                                                                                                                                                                                                         |
|----|---------------------------------------------------------------------------------------------------------------------------------------------------------------------------------------------------------------------------------------------------------------------------------------------------------------------------------------------------------------------------------------------------------------------------------------------------------------------------------------------------------------------------------------------------------------------------------------------------------------------------------------------------------------------------------------------------------------------------------------------------------------------------------------------------------------------------------------------------------------------------------------------------------------------------------------------------------------------------------------------------------------------------------------------------------------------------------------------------------------------------------------------------------------------------------------------------------------------------------------------------------------------------------------------------------------------------------------------------------------------------------------------------------------------------------------------------------------------------------------------------------------------------------------------------------------------------------------------------------------------------------------------------------------------------------------------------------------------------------------------------------------------------------------------------------|
| #1 | <p>"nirmatrelvir and ritonavir drug combination"[Supplementary Concept] OR "nirmatrelvir and ritonavir drug combination"[All Fields] OR "nirmatrelvir and ritonavir drug combination"[Supplementary Concept] OR "nirmatrelvir and ritonavir drug combination"[All Fields] OR "pf 07321332 ritonavir"[All Fields] OR "nirmatrelvir and ritonavir drug combination"[Supplementary Concept] OR "nirmatrelvir and ritonavir drug combination"[All Fields] OR "nirmatrelvir ritonavir"[All Fields] OR "nirmatrelvir and ritonavir drug combination"[Supplementary Concept] OR "nirmatrelvir and ritonavir drug combination"[All Fields] OR "nirmatrelvir and ritonavir drug combination"[Supplementary Concept] OR "nirmatrelvir and ritonavir drug combination"[All Fields] OR "nirmatrelvir and ritonavir drug combination"[Supplementary Concept] OR "nirmatrelvir and ritonavir drug combination"[All Fields] OR "paxlovid"[All Fields] OR "nirmatrelvir and ritonavir drug combination"[Supplementary Concept]</p>                                                                                                                                                                                                                                                                                                                                                                                                                                                                                                                                                                                                                                                                                                                                                                                      |
| #2 | <p>"COVID-19"[MeSH Terms] OR ("COVID-19"[All Fields] OR "COVID-19"[MeSH Terms] OR "covid 19 vaccines"[All Fields] OR "covid 19 vaccines"[MeSH Terms] OR "covid 19 serotherapy"[All Fields] OR "covid 19 nucleic acid testing"[All Fields] OR "covid 19 nucleic acid testing"[MeSH Terms] OR "covid 19 serological testing"[All Fields] OR "covid 19 serological testing"[MeSH Terms] OR "covid 19 testing"[All Fields] OR "covid 19 testing"[MeSH Terms] OR "sars cov 2"[All Fields] OR "sars cov 2"[MeSH Terms] OR "severe acute respiratory syndrome coronavirus 2"[All Fields] OR "ncov"[All Fields] OR "2019 ncov"[All Fields] OR ("coronavirus"[MeSH Terms] OR "coronavirus"[All Fields] OR "cov"[All Fields]) AND 2019/11/01:3000/12/31[Date - Publication]) OR ("COVID-19"[MeSH Terms] OR "COVID-19"[All Fields] OR "2019 ncov infection"[All Fields]) OR ("COVID-19"[MeSH Terms] OR "COVID-19"[All Fields] OR "2019 ncov infection"[All Fields]) OR ("COVID-19"[MeSH Terms] OR "COVID-19"[All Fields] OR "2019 ncov infections"[All Fields]) OR ("COVID-19"[MeSH Terms] OR "COVID-19"[All Fields] OR "infection 2019 ncov"[All Fields]) OR ("COVID-19"[MeSH Terms] OR "COVID-19"[All Fields] OR "sars cov 2 infection"[All Fields]) OR ("COVID-19"[MeSH Terms] OR "COVID-19"[All Fields] OR "infection sars cov 2"[All Fields]) OR ("COVID-19"[MeSH Terms] OR "COVID-19"[All Fields] OR "sars cov 2 infection"[All Fields]) OR ("COVID-19"[MeSH Terms] OR "COVID-19"[All Fields] OR "sars cov 2 infections"[All Fields]) OR ("COVID-19"[MeSH Terms] OR "COVID-19"[All Fields] OR "2019 novel coronavirus disease"[All Fields]) OR ("COVID-19"[MeSH Terms] OR "COVID-19"[All Fields] OR "2019 novel coronavirus infection"[All Fields]) OR ("COVID-19"[MeSH Terms] OR "COVID-19"[All Fields]</p> |

|       |                                                                                                                                                                                                                                                                                                                                                                                                                                                                                                                                                                                                                                                                                                                                                                                                                                                                                                                                                                                                                                                                                                                                                                                                                                                                                                                                                                                                                                                                                                                                                                                                                                                                                                                                                                                                                                                                                                                                                                                                                                                                                                                                                                                                                                                                                      |
|-------|--------------------------------------------------------------------------------------------------------------------------------------------------------------------------------------------------------------------------------------------------------------------------------------------------------------------------------------------------------------------------------------------------------------------------------------------------------------------------------------------------------------------------------------------------------------------------------------------------------------------------------------------------------------------------------------------------------------------------------------------------------------------------------------------------------------------------------------------------------------------------------------------------------------------------------------------------------------------------------------------------------------------------------------------------------------------------------------------------------------------------------------------------------------------------------------------------------------------------------------------------------------------------------------------------------------------------------------------------------------------------------------------------------------------------------------------------------------------------------------------------------------------------------------------------------------------------------------------------------------------------------------------------------------------------------------------------------------------------------------------------------------------------------------------------------------------------------------------------------------------------------------------------------------------------------------------------------------------------------------------------------------------------------------------------------------------------------------------------------------------------------------------------------------------------------------------------------------------------------------------------------------------------------------|
|       | <p>OR "covid 19 virus infection"[All Fields]) OR ("COVID-19"[MeSH Terms] OR "COVID-19"[All Fields] OR "covid 19 virus infection"[All Fields]) OR ("COVID-19"[MeSH Terms] OR "COVID-19"[All Fields] OR "covid 19 virus infections"[All Fields]) OR ("COVID-19"[MeSH Terms] OR "COVID-19"[All Fields] OR ("COVID-19"[MeSH Terms] OR "COVID-19"[All Fields] OR "virus infection covid 19"[All Fields]) OR ("COVID-19"[MeSH Terms] OR "COVID-19"[All Fields] OR "covid19"[All Fields]) OR ("COVID-19"[MeSH Terms] OR "COVID-19"[All Fields] OR "coronavirus disease 2019"[All Fields]) OR ("COVID-19"[MeSH Terms] OR "COVID-19"[All Fields] OR "disease 2019 coronavirus"[All Fields]) OR ("COVID-19"[MeSH Terms] OR "COVID-19"[All Fields] OR "coronavirus disease 19"[All Fields]) OR ("COVID-19"[MeSH Terms] OR "COVID-19"[All Fields] OR "coronavirus disease 19"[All Fields]) OR ("COVID-19"[MeSH Terms] OR "COVID-19"[All Fields] OR "severe acute respiratory syndrome coronavirus 2 infection"[All Fields]) OR ("COVID-19"[MeSH Terms] OR "COVID-19"[All Fields] OR "covid 19 virus disease"[All Fields]) OR ("COVID-19"[MeSH Terms] OR "COVID-19"[All Fields] OR "covid 19 virus disease"[All Fields]) OR ("COVID-19"[MeSH Terms] OR "COVID-19"[All Fields] OR "COVID-19"[All Fields] OR "disease covid 19 virus"[All Fields]) OR ("COVID-19"[MeSH Terms] OR "COVID-19"[All Fields] OR "virus disease covid 19"[All Fields]) OR ("COVID-19"[MeSH Terms] OR "COVID-19"[All Fields] OR "sars coronavirus 2 infection"[All Fields]) OR ("COVID-19"[MeSH Terms] OR "COVID-19"[All Fields] OR "2019 ncov disease"[All Fields]) OR ("COVID-19"[MeSH Terms] OR "COVID-19"[All Fields] OR "2019 ncov disease"[All Fields]) OR ("COVID-19"[MeSH Terms] OR "COVID-19"[All Fields] OR "2019 ncov diseases"[All Fields]) OR ("COVID-19"[MeSH Terms] OR "COVID-19"[All Fields] OR "disease 2019 ncov"[All Fields]) OR ("COVID-19"[MeSH Terms] OR "COVID-19"[All Fields] OR "covid 19 pandemic"[All Fields]) OR ("COVID-19"[MeSH Terms] OR "COVID-19"[All Fields] OR "covid 19 pandemic"[All Fields]) OR ("COVID-19"[MeSH Terms] OR "COVID-19"[All Fields] OR "pandemic covid 19"[All Fields]) OR ("COVID-19"[MeSH Terms] OR "COVID-19"[All Fields] OR "covid 19 pandemics"[All Fields]))</p> |
| #3    | #1 AND #2 (limited time from 1,1,2020 to 1,8, 2023)                                                                                                                                                                                                                                                                                                                                                                                                                                                                                                                                                                                                                                                                                                                                                                                                                                                                                                                                                                                                                                                                                                                                                                                                                                                                                                                                                                                                                                                                                                                                                                                                                                                                                                                                                                                                                                                                                                                                                                                                                                                                                                                                                                                                                                  |
| Total | 208                                                                                                                                                                                                                                                                                                                                                                                                                                                                                                                                                                                                                                                                                                                                                                                                                                                                                                                                                                                                                                                                                                                                                                                                                                                                                                                                                                                                                                                                                                                                                                                                                                                                                                                                                                                                                                                                                                                                                                                                                                                                                                                                                                                                                                                                                  |



Table S1c: The search details of Embase

|       |                                                                                                                                                                                                                                                                                                                                                                                                                                                                                                                                                                                                                                                                                                                                                                                                                                                                                                                                                                                                                                                                                                                                                                                                                                                                                                                                                                  |
|-------|------------------------------------------------------------------------------------------------------------------------------------------------------------------------------------------------------------------------------------------------------------------------------------------------------------------------------------------------------------------------------------------------------------------------------------------------------------------------------------------------------------------------------------------------------------------------------------------------------------------------------------------------------------------------------------------------------------------------------------------------------------------------------------------------------------------------------------------------------------------------------------------------------------------------------------------------------------------------------------------------------------------------------------------------------------------------------------------------------------------------------------------------------------------------------------------------------------------------------------------------------------------------------------------------------------------------------------------------------------------|
| #1    | <p>covid AND 19 OR ('2019 ncov' AND infection) OR (2019 AND ncov AND infection) OR ('2019 ncov' AND infections) OR (infection, AND '2019 ncov') OR ('sars cov 2' AND infection) OR (infection, AND 'sars cov 2') OR (sars AND cov AND 2 AND infection) OR ('sars cov 2' AND infections) OR (2019 AND novel AND coronavirus AND disease) OR (2019 AND novel AND coronavirus AND infection) OR ('covid 19' AND virus AND infection) OR (covid AND 19 AND virus AND infection) OR ('covid 19' AND virus AND infections) OR (infection, AND 'covid 19' AND virus) OR (virus AND infection, AND 'covid 19') OR covid19 OR (coronavirus AND disease AND 2019) OR (disease AND 2019, AND coronavirus) OR (coronavirus AND 'disease 19') OR (coronavirus AND disease AND 19) OR (severe AND acute AND respiratory AND syndrome AND coronavirus AND 2 AND infection) OR ('covid 19' AND virus AND disease) OR (covid AND 19 AND virus AND disease) OR ('covid 19' AND virus AND diseases) OR (disease, AND 'covid 19' AND virus) OR (virus AND disease, AND 'covid 19') OR (sars AND coronavirus AND 2 AND infection) OR ('2019 ncov' AND disease) OR (2019 AND ncov AND disease) OR ('2019 ncov' AND diseases) OR (disease, AND '2019 ncov') OR ('covid 19' AND pandemic) OR (covid AND 19 AND pandemic) OR (pandemic, AND 'covid 19') OR ('covid 19' AND pandemics)</p> |
| #2    | <p>paxlovid AND nirmatrelvir, AND ritonavir AND drug AND combination OR ('pf 07321332,' AND ritonavir) OR (nirmatrelvir, AND ritonavir) OR ('pf 07321332' AND ritonavir AND drug AND combination) OR ('pf 07321332,' AND ritonavir AND drug AND combination)</p>                                                                                                                                                                                                                                                                                                                                                                                                                                                                                                                                                                                                                                                                                                                                                                                                                                                                                                                                                                                                                                                                                                 |
| #3    | <p>#1 AND #2 (limited time from 1,1,2020 to 1,8, 2023)</p>                                                                                                                                                                                                                                                                                                                                                                                                                                                                                                                                                                                                                                                                                                                                                                                                                                                                                                                                                                                                                                                                                                                                                                                                                                                                                                       |
| Total | 574                                                                                                                                                                                                                                                                                                                                                                                                                                                                                                                                                                                                                                                                                                                                                                                                                                                                                                                                                                                                                                                                                                                                                                                                                                                                                                                                                              |

Table S1d: The search details of the Cochrane Library

|       |                                                                                                                                                                                                                |
|-------|----------------------------------------------------------------------------------------------------------------------------------------------------------------------------------------------------------------|
| #1    | (Paxlovid) OR (nirmatrelvir, ritonavir drug combination) OR (PF-07321332, ritonavir) OR (nirmatrelvir, ritonavir) OR (PF-07321332 and ritonavir drug combination) OR (PF-07321332, ritonavir drug combination) |
| #2    | (COVID-19) OR (SARS-CoV-2 Infection) OR (COVID-19 Virus Disease) OR (Coronavirus Disease 2019) OR (COVID-19 Pandemics)                                                                                         |
| #3    | #1 AND #2 (limited time from 1,1,2020 to 1,8,2023 and limited on trials)                                                                                                                                       |
| Total | 23                                                                                                                                                                                                             |

eTable 2: The data on outcomes

eTable 2a: The data on all-cause death or hospitalization within 30 days

| Study                 | events | total | events | total  |
|-----------------------|--------|-------|--------|--------|
| Bajema, 2022          | 25     | 1126  | 51     | 1108   |
| Dryden-Peterson, 2022 | 63     | 11859 | 219    | 28377  |
| Ganatra, 2022         | 89     | 1130  | 163    | 1130   |
| Schwartz, 2022        | 166    | 7527  | 4994   | 142694 |
| Wang, 2022 (a)        | 9      | 93    | 13     | 102    |
| Wang, 2022 (b)        | 34     | 1850  | 465    | 18138  |
| Zhou, 2022            | 20     | 1897  | 412    | 7207   |

eTable 2b: The data on all-cause death within 30 days

| Study          | events | total | events | total  |
|----------------|--------|-------|--------|--------|
| Ganatra, 2022  | 0      | 1130  | 10     | 1130   |
| Schwartz, 2022 | 130    | 7527  | 4424   | 142694 |
| Wang, 2022 (a) | 1      | 93    | 4      | 102    |
| Wang, 2022 (b) | 1      | 1850  | 39     | 18138  |

Table S3: Quality assignments based on the Newcastle-Ottawa Scale

| study                 | selection          |                          |                           |                              | comparability                           |                                     |                       | outcome                                |                                      |
|-----------------------|--------------------|--------------------------|---------------------------|------------------------------|-----------------------------------------|-------------------------------------|-----------------------|----------------------------------------|--------------------------------------|
|                       | representativeness | selection of non-exposed | ascertainment of exposure | outcome not present at start | comparability on most important factors | comparability on other risk factors | assessment of outcome | long enough follow-up (median>30 days) | adequacy (completeness) of follow-up |
| Bajema, 2022          | 1                  | 1                        | 1                         | 1                            | 1                                       | 1                                   | 1                     | 1                                      | 1                                    |
| Dryden-Peterson, 2022 | 1                  | 1                        | 1                         | 1                            | 1                                       | 1                                   | 1                     | 0                                      | 1                                    |
| Ganatra, 2022         | 1                  | 1                        | 1                         | 1                            | 1                                       | 1                                   | 1                     | 1                                      | 1                                    |
| Wong, 2022 (a)        | 1                  | 1                        | 1                         | 1                            | 1                                       | 0                                   | 1                     | 1                                      | 1                                    |
| Wong, 2022 (b)        | 1                  | 1                        | 1                         | 1                            | 0                                       | 1                                   | 1                     | 1                                      | 1                                    |
| Zhou, 2022            | 1                  | 1                        | 1                         | 1                            | 1                                       | 0                                   | 1                     | 1                                      | 1                                    |
| Schwartz, 2022        | 1                  | 1                        | 1                         | 1                            | 0                                       | 0                                   | 1                     | 1                                      | 1                                    |

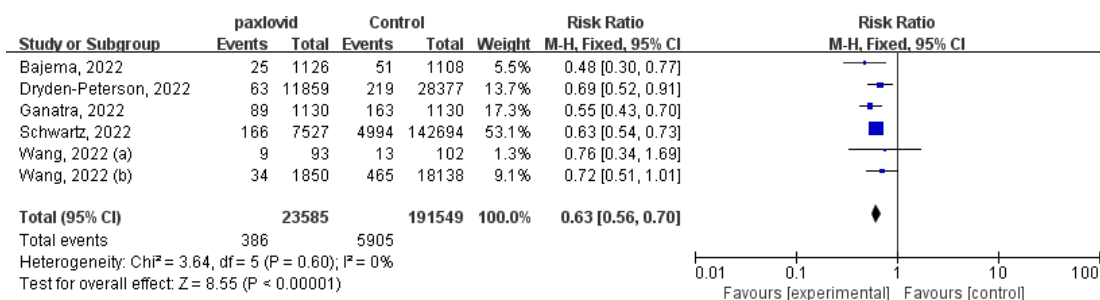

Figure S1: The forest plot of sensitive analysis for all-cause death or hospitalization within 30 days

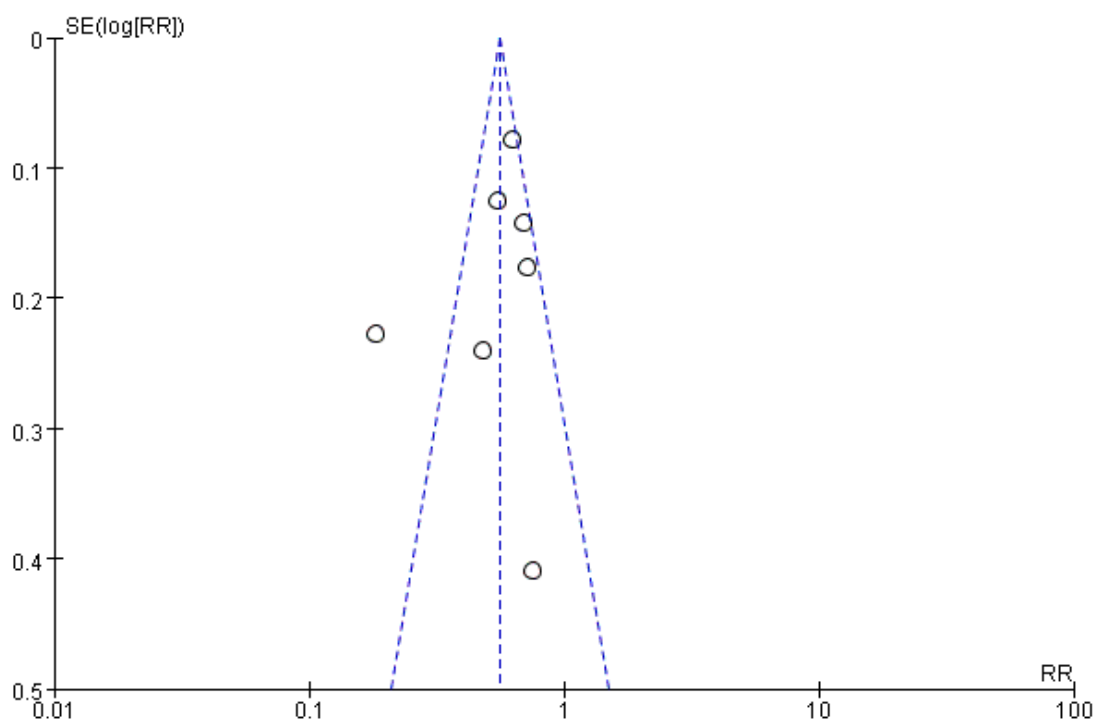

Figure S2: The funnel plot of all-cause death or hospitalization within 30 days
